# Supplementary material for: Aerosol hygroscopicity over the southeast Atlantic Ocean during the biomass burning season – Part 1: From the perspective of scattering enhancement
Source: Copernicus journal article supplement (doi:10.5194/acp-24-13849-2024), 2024-12-13
Supplement: Supplementary file 1 [file acp-24-13849-2024-supplement.pdf]

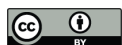

*Supplement of*

## **Aerosol hygroscopicity over the southeast Atlantic Ocean during the biomass burning season – Part 1: From the perspective of scattering enhancement**

**Lu Zhang et al.**

*Correspondence to:* Michal Segal-Rozenhaimer ([segalrozenhaimer@baeri.org](mailto:segalrozenhaimer@baeri.org)) and Haochi Che ([haochi.che@geo.uio.no](mailto:haochi.che@geo.uio.no))

The copyright of individual parts of the supplement might differ from the article licence.

1 **S1. Minor contribution of super-micron particles to the total scattering**

2 The PNSD of super-micron particles was measured by an aerodynamic particle sizer (APS),  
3 whose aerodynamic diameter was converted to the volume equivalent diameter according to  
4 DeCarlo et al. (2004). Particles were assumed to be spherical (shape factor = 1) with a density of  
5  $1.5 \text{ g cm}^{-3}$ . The dry total scattering coefficients at 540 nm were measured by Radiance Research  
6 M903 integrating nephelometer.

7 We calculated the scattering coefficient of super-micron particles at 540 nm using the Mie  
8 model, with inputs being the PNSD from APS and a refractive index of  $1.51+0.0048i$  for dust (Di  
9 Biagio et al., 2019). We have also calculated the scattering coefficient using the refractive index  
10 of sea salt and the results are similar to those using the refractive index of dust; therefore, not  
11 shown here. The ratio of the scattering coefficient of super-micron particles to the total scattering  
12 coefficient reflects the contribution of super-micron particles to the total scattering. The  
13 distribution of the ratio is shown in Fig. S1. As illustrated in the figure, 85% of the data have a  
14 ratio of less than 0.015, indicating that the contribution of super-micron particles to the total  
15 scattering is less than 1.5% for 85% of the cases, demonstrating the minimal impact of super-  
16 micron particles on the total scattering.

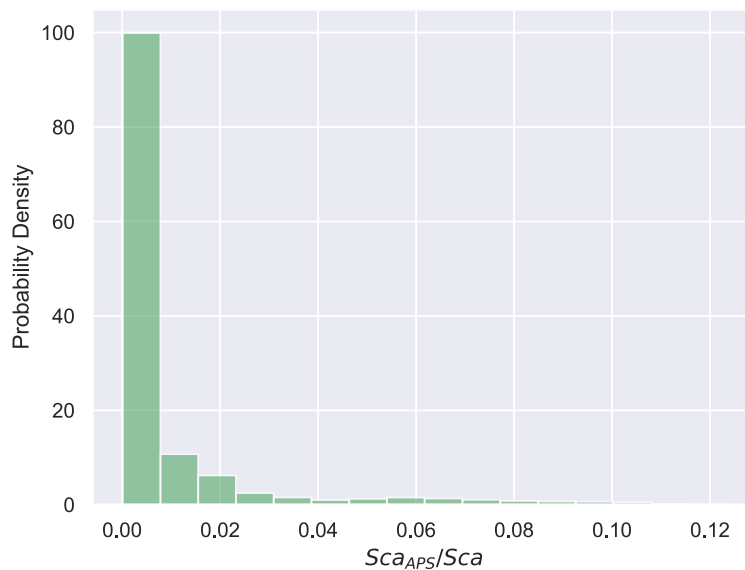

17  
18 Figure S1. The PDF distribution of the ratio ( $Sca_{APS}/Sca$ ) of the scattering coefficient of super-  
19 micron particles to the total scattering coefficient.

## 20 S2. Sensitivity of $f(\text{RH})$ to PNSD

21 The  $\gamma(\text{Fo}, \kappa_{\text{OA}}, \text{BCr})$  parameterization was obtained assuming mean PNSD with the  
22 geometric mean diameter  $D_{\text{gn}}=150$  nm and standard deviation  $\sigma_{\text{sg}}=1.6$ . To evaluate the sensitivity  
23 of  $f(\text{RH})$  to PNSD and explore its applicability to broader regions, we calculated the  $\gamma$  with various  
24  $D_{\text{gn}}$  and  $\sigma_{\text{sg}}$  and compared it to those with the mean PNSD. Results are shown in Fig. S2 taking  
25 measurements in ORACLES 2018 as an example. The deviations of  $\gamma$  calculated with  $D_{\text{gn}}$  and  $\sigma_{\text{sg}}$   
26 in their interquartile ranges and the 10<sup>th</sup> - 90<sup>th</sup> percentile ranges are both smaller than 2% and 3%,  
27 respectively, indicating a minor influence of PNSD to  $\gamma(\text{Fo}, \kappa_{\text{OA}}, \text{BCr})$  parameterization and  
28 supporting the application of  $\gamma(\text{Fo}, \kappa_{\text{OA}}, \text{BCr})$  parameterization to ORACLES 2018. For a broader  
29 aerosol population, the deviation is found to be less than 5% when  $D_{\text{gn}}$  varies from 75 nm to 210  
30 nm (approx. -50% to 35% deviated from the mean  $D_{\text{gn}}$ ) and smaller than 10% with  $\sigma_{\text{sg}}$  varying  
31 from 1.25 to 1.9 (approx.  $\pm 20\%$  deviated from the mean  $\sigma_{\text{sg}}$ ). The broad ranges of  $D_{\text{gn}}$  and  $\sigma_{\text{sg}}$   
32 suggest that the  $\gamma(\text{Fo}, \kappa_{\text{OA}}, \text{BCr})$  parameterization can be applied to broader aerosol populations  
33 (Hussein et al., 2004; Shen et al., 2015). Caution is needed when Aitken mode aerosols are  
34 dominant such as new particle formation events, as the deviation of  $\gamma$  increases sharply for  $D_{\text{gn}}$   
35 smaller than 75 nm or  $\sigma_{\text{sg}}$  less than 1.25 (Fig. S1). We believe this parameterization would benefit  
36 investigations of aerosol direct radiative forcing, aerosol liquid water content, comparison and  
37 evaluation of remote sensing and in situ measurements, and visibility degradation.

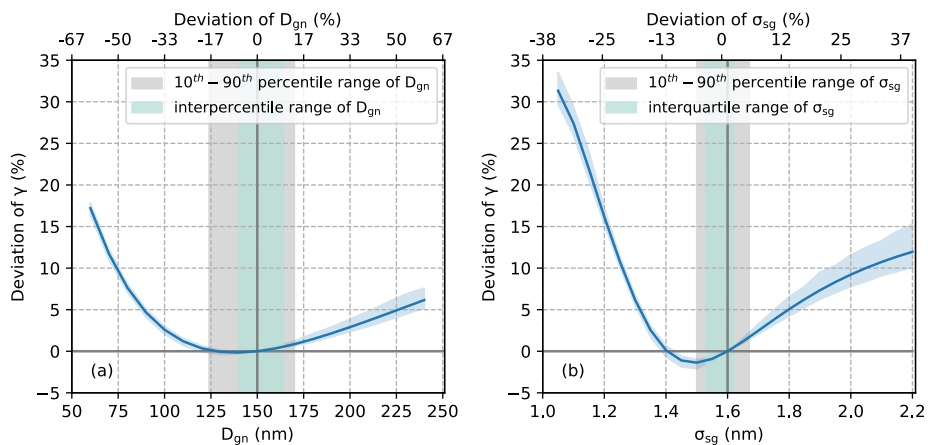

38  
39 Figure S2. The sensitivity of  $\gamma$  to PNSD. (a) Deviation of  $\gamma$  predicted with various geometric mean  
40 diameters  $D_{\text{gn}}$  to that with the mean  $D_{\text{gn}}$  in ORACLES 2018 and (b) deviation of  $\gamma$  predicted with  
41 various standard deviation  $\sigma_{\text{sg}}$  to that with the mean  $\sigma_{\text{sg}}$  in ORACLES 2018. Blue lines represent

42 the mean value, and the blue shaded areas represent the 99.7% confidence interval (mean $\pm$ 3  
 43 standard deviation). The green and grey shaded areas represent the 25<sup>th</sup> to 75<sup>th</sup> percentile and the  
 44 10<sup>th</sup> to 90<sup>th</sup> percentile of  $D_{gn}$  or  $\sigma_{sg}$ , respectively, in ORACLES 2018. The upper x-axis shows the  
 45 deviation of  $D_{gn}$  or  $\sigma_{sg}$  to its mean values in ORACLES 2018.

46

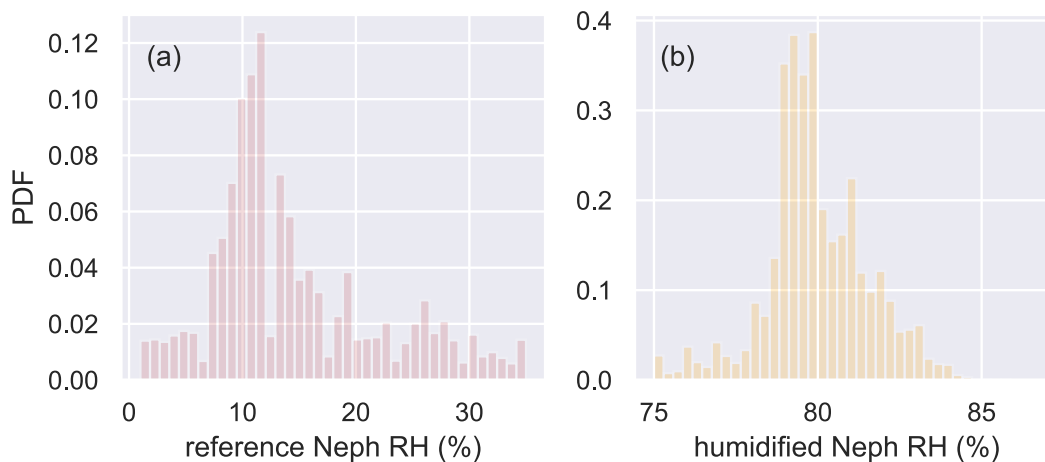

47

48 Figure S3. Distributions of the RHs for reference and humidified Neph during the campaign.

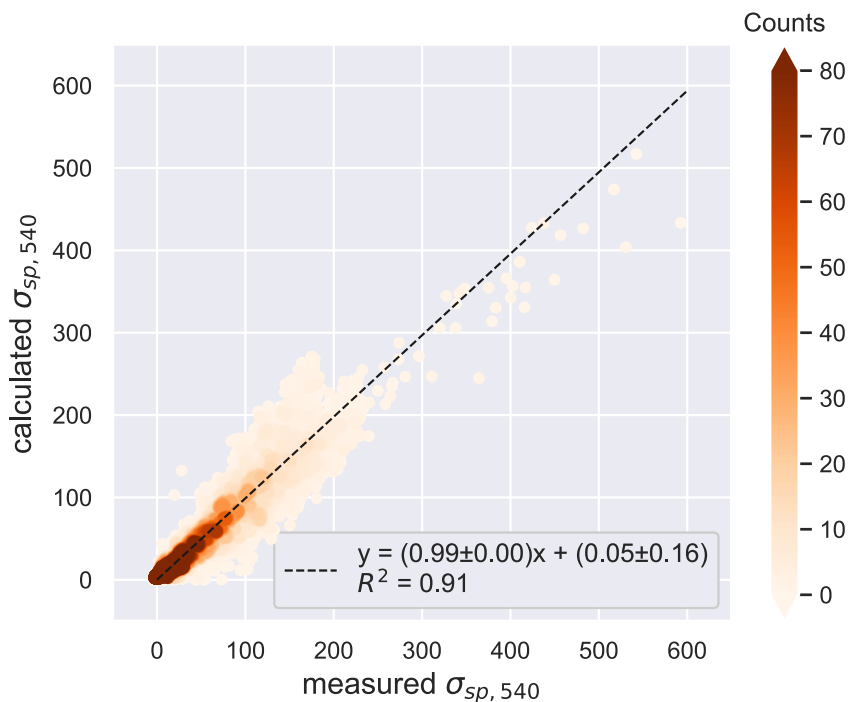

49

50 Figure S4. Calculated and measured scattering coefficients under dry conditions, colored by the  
51 count of data in each dot.

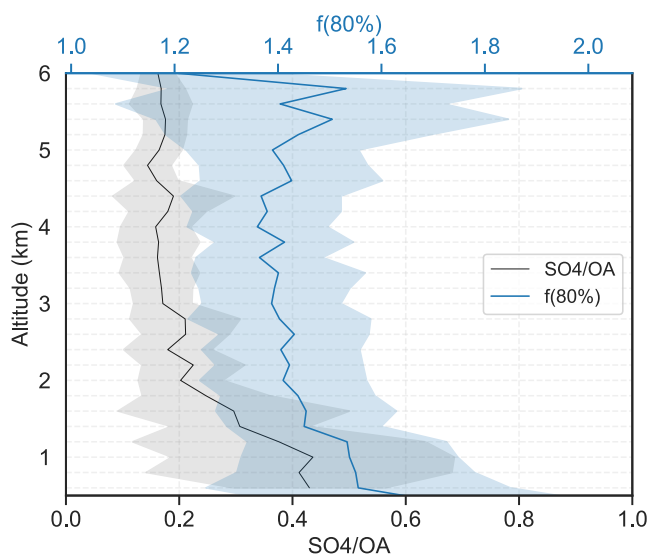

52  
53 Figure S5. Vertical distributions of  $\text{SO}_4/\text{OA}$  and  $f(80\%)$  in 2016 and 2018 ORACLES campaigns.  
54 The lines are the mean value in every 200 m bin. Shadings represent the standard deviation in  
55 every 200 m bin.

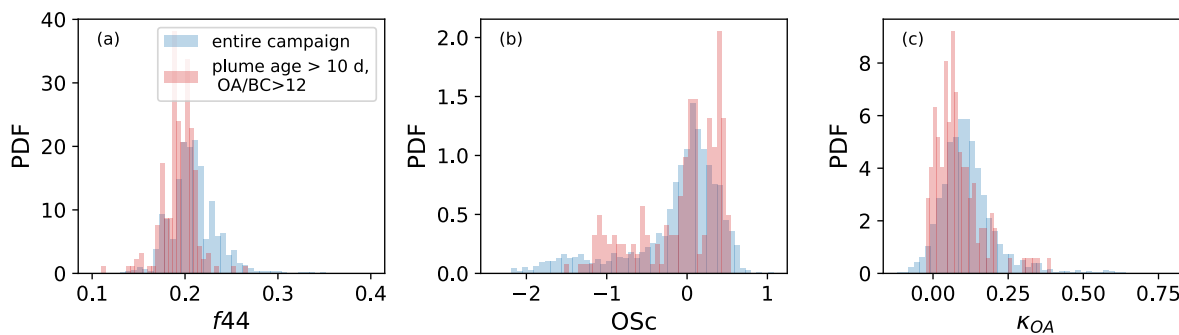

56  
57 Figure S6. PDF of  $f_{44}$ ,  $\text{OS}_c$ , and  $\kappa_{\text{OA}}$  for the entire 2016 and 2018 ORACLES campaign and for  
58 aerosols with plume age  $> 10$  days and  $\text{OA}/\text{BC} > 12$ .

59

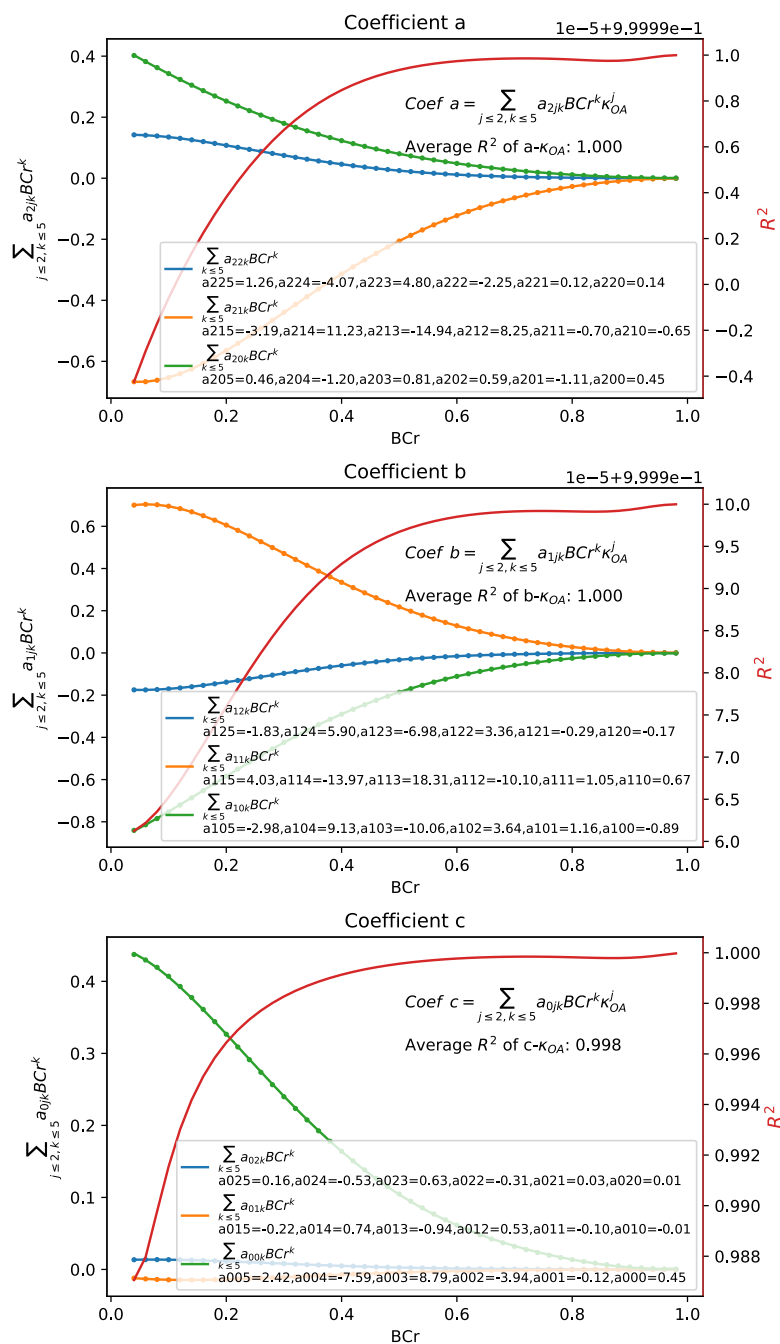

60  
 61 Figure S7. Coefficients a, b, and c of the second-order polynomial fit  $M(\text{Fo}, \kappa_{\text{OA}}, \text{BCr}) = a\text{Fo}^2 + b\text{Fo} + c$ . The a, b, and c can be further fitted into a second-order polynomial fit of  $\kappa_{\text{OA}}$  with  
 62 coefficients being  $\sum_{j=2, k=5} a_{2jk} BCr^k$ ,  $\sum_{j=2, k=5} a_{1jk} BCr^k$ , and  $\sum_{j=2, k=5} a_{0jk} BCr^k$ , respectively. Red lines  
 63 represent the correlation coefficient  $R^2$  of the quadratic relationship between a, b, and c with  $\kappa_{\text{OA}}$   
 64

65 under each BCr, average values are shown in the texts. These coefficients are fitted into a fifth-  
 66 order polynomial equation with BCr with coefficients shown in each legend.

67

68 Table S1. Density ( $\rho$ ), refractive index ( $m=n+ik$ ) at 540 nm, and hygroscopicity parameter ( $\kappa$ ) of  
 69 inorganics, OA, and BC used in this study.

|                              | (NH <sub>4</sub> ) <sub>2</sub> SO <sub>4</sub>                      | NH <sub>4</sub> HSO <sub>4</sub> | NH <sub>4</sub> NO <sub>3</sub>                                      | KCl                          | OA                            | BC                                                                  |
|------------------------------|----------------------------------------------------------------------|----------------------------------|----------------------------------------------------------------------|------------------------------|-------------------------------|---------------------------------------------------------------------|
| $\rho$ (g cm <sup>-3</sup> ) | 1.77<br>(Lide, 2008)                                                 | 1.78<br>(Lide, 2008)             | 1.72<br>(Lide, 2008)                                                 | 1.98<br>(Kuang et al., 2021) | 1.4<br>(Alfarra et al., 2006) | 1.8<br>(Bond and Bergstrom, 2006; Liu et al., 2017)                 |
| $m=n+ik$                     | 1.45 <sup>a</sup>                                                    | 1.44 <sup>a</sup>                | 1.56 <sup>a</sup>                                                    | 1.46 <sup>a</sup>            | 1.65<br>(Feng et al., 2013)   | 1.95+0.79i<br>(Bond and Bergstrom, 2006; Liu et al., 2021)          |
| $\kappa$                     | 0.47<br>(Topping et al., 2005; Gysel et al., 2007; Kim et al., 2020) | 0.56<br>(Kuang et al., 2021)     | 0.58<br>(Topping et al., 2005; Gysel et al., 2007; Kim et al., 2020) | 0.89<br>(Kuang et al., 2021) | n/a <sup>b</sup>              | 0<br>(Kuang et al., 2021; Topping et al., 2005; Gysel et al., 2007) |

70 <sup>a</sup> Aerosol Refractive Index Archive from <http://eodg.atm.ox.ac.uk/ARIA/> based on Cotterell et  
 71 al. (Cotterell et al., 2017) and Query (Query, 1985); <sup>b</sup>  $\kappa_{OA}$  is determined in the study.

72

73 Table S2. The mean and standard deviation of aerosol hygroscopicity related parameters.

|                     | 2016      |           | 2018      |           |
|---------------------|-----------|-----------|-----------|-----------|
|                     | >2 km     | <2 km     | >2 km     | <2 km     |
| $f(80\%)$           | 1.41±0.18 | 1.51±0.23 | 1.38±0.15 | 1.50±0.15 |
| $\kappa_{(RH)}$     | 0.22±0.07 | 0.23±0.09 | 0.18±0.07 | 0.21±0.06 |
| $\kappa_{OA}$       | 0.11±0.09 | 0.14±0.11 | 0.10±0.06 | 0.15±0.05 |
| SO <sub>4</sub> (%) | 10.0±2.9  | 19.7±9.3  | 13.3±3.7  | 18.9±5.4  |
| OA(%)               | 67.5±5.9  | 60.1±9.6  | 65.7±4.0  | 51.6±9.2  |
| Age (d)             | 7.2±2.6   | 8.6±1.8   | 6.3±1.2   | 9.3±1.4   |
| $f_{44}$            | 0.21±0.03 | 0.22±0.03 | 0.21±0.02 | 0.24±0.03 |

74

75 Table S3. Parameterization coefficients of  $M(\text{Fo}, \kappa_{\text{OA}}, \text{BCr})$  and  $\gamma(\text{Fo}, \kappa_{\text{OA}}=0, \text{BCr})$  in Eq. 4 and 5.  
 76 Columns are the subscripts of parameter  $a$ .  $a_{X5}$  with X of 00 represents  $a_{005}$  ( $i=0, j=0, k=5$ ) used  
 77 in Eq. 5.

| Subscript<br>X | $a_{X5}$ | $a_{X4}$ | $a_{X3}$ | $a_{X2}$ | $a_{X1}$ | $a_{X0}$ |
|----------------|----------|----------|----------|----------|----------|----------|
| 00             | 2.42     | -7.59    | 8.79     | -3.94    | -0.12    | 0.45     |
| 01             | -0.22    | 0.74     | -0.94    | 0.53     | -0.10    | -0.01    |
| 02             | 0.16     | -0.53    | 0.63     | -0.31    | 0.03     | 0.01     |
| 10             | -2.98    | 9.13     | -10.06   | 3.64     | 1.16     | -0.89    |
| 11             | 4.03     | -13.97   | 18.31    | -10.10   | 1.05     | 0.67     |
| 12             | -1.83    | 5.90     | -6.98    | 3.36     | -0.29    | -0.17    |
| 20             | 0.46     | -1.20    | 0.81     | 0.59     | -1.11    | 0.45     |
| 21             | -3.19    | 11.23    | -14.94   | 8.25     | -0.70    | -0.65    |
| 22             | 1.26     | -4.07    | 4.80     | -2.25    | 0.12     | 0.14     |
| 0              | 0.83     | -3.13    | 4.44     | -2.66    | -0.14    | 0.67     |
| 1              | 0.61     | -1.94    | 2.56     | -1.90    | 1.33     | -0.66    |
| 2              | -1.25    | 4.48     | -6.31    | 4.21     | -1.13    | -0.00    |

78

79



$M(Fo, \kappa_{OA}, BCr)$

$$= [Fo^2 \quad Fo \quad 1] \left[ \begin{array}{c} [\kappa_{OA}^2 \quad \kappa_{OA} \quad 1] \left( \begin{array}{c} [a_{225} \quad a_{224} \quad a_{223} \quad a_{222} \quad a_{221} \quad a_{220}] \\ [a_{215} \quad a_{214} \quad a_{213} \quad a_{212} \quad a_{211} \quad a_{210}] \\ [a_{205} \quad a_{204} \quad a_{203} \quad a_{202} \quad a_{201} \quad a_{200}] \end{array} \begin{array}{c} [BCr^5] \\ [BCr^4] \\ [BCr^3] \\ [BCr^2] \\ [BCr] \\ [1] \end{array} \right) \\ [\kappa_{OA}^2 \quad \kappa_{OA} \quad 1] \left( \begin{array}{c} [a_{125} \quad a_{124} \quad a_{123} \quad a_{122} \quad a_{121} \quad a_{120}] \\ [a_{115} \quad a_{114} \quad a_{113} \quad a_{112} \quad a_{111} \quad a_{110}] \\ [a_{105} \quad a_{104} \quad a_{103} \quad a_{102} \quad a_{101} \quad a_{100}] \end{array} \begin{array}{c} [BCr^5] \\ [BCr^4] \\ [BCr^3] \\ [BCr^2] \\ [BCr] \\ [1] \end{array} \right) \\ [\kappa_{OA}^2 \quad \kappa_{OA} \quad 1] \left( \begin{array}{c} [a_{025} \quad a_{024} \quad a_{023} \quad a_{022} \quad a_{021} \quad a_{020}] \\ [a_{015} \quad a_{014} \quad a_{013} \quad a_{012} \quad a_{011} \quad a_{010}] \\ [a_{005} \quad a_{004} \quad a_{003} \quad a_{002} \quad a_{001} \quad a_{000}] \end{array} \begin{array}{c} [BCr^5] \\ [BCr^4] \\ [BCr^3] \\ [BCr^2] \\ [BCr] \\ [1] \end{array} \right) \end{array} \right] \quad (S1)$$

$$\gamma(Fo, \kappa_{OA} = 0, BCr) = [Fo^2 \quad Fo \quad 1] \left( \begin{array}{c} [a_{25} \quad a_{24} \quad a_{23} \quad a_{22} \quad a_{21} \quad a_{20}] \\ [a_{15} \quad a_{14} \quad a_{13} \quad a_{12} \quad a_{11} \quad a_{10}] \\ [a_{05} \quad a_{04} \quad a_{03} \quad a_{02} \quad a_{01} \quad a_{00}] \end{array} \begin{array}{c} [BCr^5] \\ [BCr^4] \\ [BCr^3] \\ [BCr^2] \\ [BCr] \\ [1] \end{array} \right) \quad (S2)$$

80

81

## 82 References

83 Alfarra, M. R., Paulsen, D., Gysel, M., Garforth, A. A., Dommen, J., Prévôt, A. S. H., Worsnop,  
84 D. R., Baltensperger, U., and Coe, H.: A mass spectrometric study of secondary organic aerosols  
85 formed from the photooxidation of anthropogenic and biogenic precursors in a reaction chamber,  
86 *Atmospheric Chem. Phys.*, 6, 5279–5293, <https://doi.org/10.5194/acp-6-5279-2006>, 2006.

87 Bond, T. C. and Bergstrom, R. W.: Light Absorption by Carbonaceous Particles: An

88 Investigative Review, *Aerosol Sci. Technol.*, 40, 27–67,

89 <https://doi.org/10.1080/02786820500421521>, 2006.

90 Cotterell, M. I., Willoughby, R. E., Bzdek, B. R., Orr-Ewing, A. J., and Reid, J. P.: A complete

91 parameterisation of the relative humidity and wavelength dependence of the refractive index of

92 hygroscopic inorganic aerosol particles, *Atmospheric Chem. Phys.*, 17, 9837–9851,  
93 <https://doi.org/10.5194/acp-17-9837-2017>, 2017.

94 Feng, Y., Ramanathan, V., and Kotamarthi, V. R.: Brown carbon: a significant atmospheric  
95 absorber of solar radiation?, *Atmospheric Chem. Phys.*, 13, 8607–8621,  
96 <https://doi.org/10.5194/acp-13-8607-2013>, 2013.

97 Gysel, M., Crosier, J., Topping, D. O., Whitehead, J. D., Bower, K. N., Cubison, M. J., Williams,  
98 P. I., Flynn, M. J., McFiggans, G. B., and Coe, H.: Closure study between chemical composition  
99 and hygroscopic growth of aerosol particles during TORCH2, *Atmospheric Chem. Phys.*, 7,  
100 6131–6144, <https://doi.org/10.5194/acp-7-6131-2007>, 2007.

101 Hussein, T., Puustinen, A., Aalto, P. P., Mäkelä, J. M., Hämeri, K., and Kulmala, M.: Urban  
102 aerosol number size distributions, *Atmospheric Chem. Phys.*, 4, 391–411,  
103 <https://doi.org/10.5194/acp-4-391-2004>, 2004.

104 Kim, N., Yum, S. S., Park, M., Park, J. S., Shin, H. J., and Ahn, J. Y.: Hygroscopicity of urban  
105 aerosols and its link to size-resolved chemical composition during spring and summer in Seoul,  
106 Korea, *Atmospheric Chem. Phys.*, 20, 11245–11262, [https://doi.org/10.5194/acp-20-11245-](https://doi.org/10.5194/acp-20-11245-2020)  
107 2020, 2020.

108 Kuang, Y., Huang, S., Xue, B., Luo, B., Song, Q., Chen, W., Hu, W., Li, W., Zhao, P., Cai, M.,  
109 Peng, Y., Qi, J., Li, T., Wang, S., Chen, D., Yue, D., Yuan, B., and Shao, M.: Contrasting effects  
110 of secondary organic aerosol formations on organic aerosol hygroscopicity, *Atmospheric Chem.*  
111 *Phys.*, 21, 10375–10391, <https://doi.org/10.5194/acp-21-10375-2021>, 2021.

112 Lide, D. R. (Ed.): *CRC Handbook of Chemistry and Physics*, 89th Edition, 89th edition., CRC  
113 Press, Boca Raton, 2736 pp., 2008.

114 Liu, D., Whitehead, J., Alfarra, M. R., Reyes-Villegas, E., Spracklen, D. V., Reddington, C. L.,  
115 Kong, S., Williams, P. I., Ting, Y.-C., Haslett, S., Taylor, J. W., Flynn, M. J., Morgan, W. T.,  
116 McFiggans, G., Coe, H., and Allan, J. D.: Black-carbon absorption enhancement in the  
117 atmosphere determined by particle mixing state, *Nat. Geosci.*, 10, 184–188,  
118 <https://doi.org/10.1038/ngeo2901>, 2017.

- 119 Liu, D., Li, S., Hu, D., Kong, S., Cheng, Y., Wu, Y., Ding, S., Hu, K., Zheng, S., Yan, Q.,  
120 Zheng, H., Zhao, D., Tian, P., Ye, J., Huang, M., and Ding, D.: Evolution of Aerosol Optical  
121 Properties from Wood Smoke in Real Atmosphere Influenced by Burning Phase and Solar  
122 Radiation, *Environ. Sci. Technol.*, *55*, 5677–5688, <https://doi.org/10.1021/acs.est.0c07569>, 2021.
- 123 Query, M. R.: *Optical Constants*, US Army Chem. Res., Aberdeen Proving Ground, 418, 1985.
- 124 Shen, X. J., Sun, J. Y., Zhang, X. Y., Zhang, Y. M., Zhang, L., Che, H. C., Ma, Q. L., Yu, X. M.,  
125 Yue, Y., and Zhang, Y. W.: Characterization of submicron aerosols and effect on visibility  
126 during a severe haze-fog episode in Yangtze River Delta, China, *Atmos. Environ.*, *120*, 307–316,  
127 <https://doi.org/10.1016/j.atmosenv.2015.09.011>, 2015.
- 128 Topping, D. O., McFiggans, G. B., and Coe, H.: A curved multi-component aerosol  
129 hygroscopicity model framework: Part 1 – Inorganic compounds, *Atmospheric Chem. Phys.*, *5*,  
130 1205–1222, <https://doi.org/10.5194/acp-5-1205-2005>, 2005.

131
